# Supplementary material for: Improving health literacy through group antenatal care: a prospective cohort study
Source: PubMed Central journal article supplement (PMC5513199; doi:10.1186/s12884-017-1414-5), 2017-07-14
Supplement: 12884_2017_1414_MOESM2_ESM.pdf [file 12884_2017_1414_MOESM2_ESM.pdf]

Date: \_\_\_\_\_

Participant ID Number: \_\_\_\_\_

### DEMOGRAPHICS

These data will be collected from women in both the intervention group and the control group when they are enrolled in the study.

1. How old were you on your last birthday? \_\_\_\_\_
2. What is your religion?
  - Christian
  - Muslim
  - Buddhist
  - Pagan
  - None
3. What is your occupation? \_\_\_\_\_
4. What is your marital status?
  - Married
  - Single
  - Divorced
  - Widowed
5. Have you ever attended school?
  - Yes
  - No
6. If yes, what is the highest level/grade of school you attended? \_\_\_\_\_
7. Do you know how to read?
  - Yes
  - No
8. What language do you speak (check all that apply):
  - Twi
  - English
  - Housa
  - Other \_\_\_\_\_
9. Do you know how to write?
  - Yes
  - No
10. How many times have you been pregnant? \_\_\_\_\_
11. How many living children do you have? \_\_\_\_\_
12. Where was each of your children born?

|                    |                               |                                   |
|--------------------|-------------------------------|-----------------------------------|
| Child 1 (oldest)   | <input type="checkbox"/> Home | <input type="checkbox"/> Hospital |
| Child 2            | <input type="checkbox"/> Home | <input type="checkbox"/> Hospital |
| Child 3            | <input type="checkbox"/> Home | <input type="checkbox"/> Hospital |
| Child 4 (youngest) | <input type="checkbox"/> Home | <input type="checkbox"/> Hospital |

(Add more below as needed)

- 
13. How far away from Manhyia District Hospital do you live? (how long does it take you to travel to Manhyia for care ( in minutes)and how do you get here? (type of transport i.e) car, walk, taxi, tro-tro)
- 
-
