# Supplementary material for: Improving health literacy through group antenatal care: a prospective cohort study
Source: Springer Nature journal article supplement (doi:10.1186/s12884-017-1414-5), 2017-07-14
Supplement: MOESM1 [file 13304186]

**NEW AVENUES TO INCREASE THE USE OF SKILLED BIRTH ATTENDANTS IN  
GHANA – AIM 3**

**CHART REVIEW GUIDE**

This form will be used to collect data after the woman has delivered. Data will be retrieved from her medical record (if a facility birth has occurred), or from an interview with the woman if she delivered at home.

**Date of Chart Review:** \_\_\_\_\_

**Date of Interview:** \_\_\_\_\_

**Date of Delivery:** \_\_\_\_\_

**Where did the woman deliver:** \_\_\_\_\_

**Participant ID Number:** \_\_\_\_\_

**Live Infant:** Yes/No

**Multiple:** Yes/No

**If no: Stillbirth:** Yes/No

**Early Neonatal death in the first 7 days:** Yes/No

**Late Neonatal death in the first 30 days:** Yes/No

**Apgars:** 1 minute \_\_\_\_\_ 5 minutes \_\_\_\_\_

**Birth Weight:** \_\_\_\_\_

**Mother's Hemoglobin before delivery** \_\_\_\_\_

**Mother's Hemoglobin after delivery** \_\_\_\_\_

**Type of Delivery:**

- Vaginal
- Forceps/Vacuum
- Caesarean Section

**Mother Alive:** Yes/No

**1. Did any of the following occur:**

**a. Maternal morbidities:**

- |                             |        |
|-----------------------------|--------|
| i. Pre-eclampsia/eclampsia  | Yes/No |
| ii. Post partum haemorrhage | Yes/No |
| iii. Anemia                 | Yes/No |
| iv. Ruptured uterus         | Yes/No |
| v. Sepsis                   | Yes/No |

**b. Neonatal morbidities:**

- |                         |        |
|-------------------------|--------|
| i. Respiratory distress | Yes/No |
| ii. Sepsis              | Yes/No |
